# Supplementary material for: Central and Peripheral Inflammation in Mild Cognitive Impairment in the Context of Alzheimer’s Disease
Source: MDPI journal article supplement (doi:10.3390/ijms241310523), 2023-06-23
Supplement: s1 [file s1]

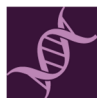

Article

# Central and Peripheral Inflammation in Mild Cognitive Impairment in the Context of Alzheimer's Disease

Inès Schmidt-Morgenroth <sup>1,2</sup>, Philippe Michaud <sup>2</sup>, Fabrizio Gasparini <sup>1</sup> and Alexandre Avrameas <sup>1,\*</sup>

## Supplementary Materials

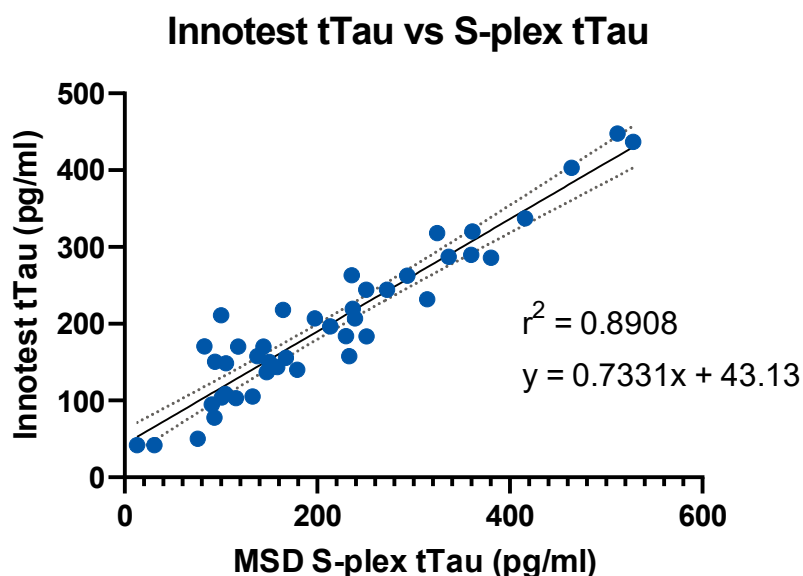

Figure S1. Linear regression between FUJIREBIO INNTOTEST total Tau (tTau) diagnostic test and MESOSCALE DISCOVERY (MSD) S-plex total Tau. Measurements were done with Non-impaired (NIC) CSF samples. Regression curve expression  $y = 0.7331x + 43.13$ , r-square = 0.8908 and  $p$ -value < 0.0001.

(a)

| MCI<br>n = 32            |              | CSF biomarkers (r, p) |                   |         |
|--------------------------|--------------|-----------------------|-------------------|---------|
|                          |              | A $\beta$ 42          | tTau              | pTau181 |
| CSF biomarkers<br>(r, p) | A $\beta$ 42 | 1.0000                |                   |         |
|                          |              | -                     |                   |         |
|                          | tTau         | 0.2188                | 1.0000            |         |
|                          |              | 0.2288                | -                 |         |
|                          | pTau181      | 0.0710                | <b>0.7317</b>     | 1.0000  |
|                          |              | 0.7094                | <b>&lt;0.0001</b> | -       |

(b)

| NIC<br>n = 45            |              | CSF biomarkers (r, p) |               |         |
|--------------------------|--------------|-----------------------|---------------|---------|
|                          |              | A $\beta$ 42          | tTau          | pTau181 |
| CSF biomarkers<br>(r, p) | A $\beta$ 42 | 1.0000                |               |         |
|                          |              | -                     |               |         |
|                          | tTau         | -0.0844               | 1.0000        |         |
|                          |              | 0.5858                | -             |         |
|                          | pTau181      | -0.0762               | <b>0.5213</b> | 1.0000  |
|                          |              | 0.6636                | <b>0.0013</b> | -       |

**Table S1. Summary table of Spearman correlation between CSF AD hallmarks.** r-value and p-value are displayed for each correlation as r, p respectively. p-values < 0.05 and r-values  $\geq 0.50$  or  $\leq -0.50$  are given in bold-italic entries. (a) Mild Cognitive Impairment (MCI) cohort. (b) Non-Impaired control (NIC) cohort.

A $\beta$ : Amyloid  $\beta$ ; tTau: total Tau; pTau: phosphorylated tau.

(a)

| MCI<br>n = 32               |              | Serum biomarkers (r, p) |         |
|-----------------------------|--------------|-------------------------|---------|
|                             |              | tTau                    | pTau181 |
| CSF<br>biomarkers<br>(r, p) | A $\beta$ 42 | -0.0301                 | -0.1123 |
|                             |              | 0.8703                  | 0.5619  |
|                             | tTau         | 0.2636                  | 0.2064  |
|                             |              | 0.1450                  | 0.2827  |
|                             | pTau181      | 0.2169                  | 0.2039  |
|                             |              | 0.2496                  | 0.3076  |

(b)

| NIC<br>n = 45               |              | Serum biomarkers (r, p) |                   |
|-----------------------------|--------------|-------------------------|-------------------|
|                             |              | tTau                    | pTau181           |
| CSF<br>biomarkers<br>(r, p) | A $\beta$ 42 | -0.0189                 | -0.0346           |
|                             |              | 0.9102                  | 0.8388            |
|                             | tTau         | 0.3805                  | <b>0.6195</b>     |
|                             |              | <b>0.0185</b>           | <b>&lt;0.0001</b> |
|                             | pTau181      | 0.3075                  | <b>0.5625</b>     |
|                             |              | 0.0817                  | <b>0.0007</b>     |

**Table S2. Summary table of Spearman correlation between CSF vs serum AD hallmarks.** r-value and p-value are displayed for each correlation as r, p respectively. p-values < 0.05 and r-values  $\geq 0.50$  or  $\leq -0.50$  are given in bold-italic entries (a) MCI cohort. (b) NIC cohort.

(a)

| MCI<br>n = 32               |        | Serum biomarkers (r, p) |               |        |        |         |         |
|-----------------------------|--------|-------------------------|---------------|--------|--------|---------|---------|
|                             |        | GFAP                    | NFL           | OPN    | TIMP-1 | TREM-2  | YKL-40  |
| CSF<br>biomarkers<br>(r, p) | GFAP   | 0.1327                  | 0.1411        | 0.1338 | 0.0249 | 0.0374  | 0.1679  |
|                             |        | 0.4691                  | 0.4410        | 0.4654 | 0.8923 | 0.8390  | 0.3584  |
|                             | NFL    | 0.2034                  | 0.3083        | 0.2372 | 0.0451 | -0.1672 | 0.1309  |
|                             |        | 0.2641                  | 0.0860        | 0.1912 | 0.8064 | 0.3605  | 0.4753  |
|                             | OPN    | 0.0975                  | -0.0777       | 0.1085 | 0.1246 | 0.0704  | -0.1012 |
|                             |        | 0.5955                  | 0.6725        | 0.5544 | 0.4967 | 0.7019  | 0.5817  |
|                             | TIMP-1 | 0.2518                  | 0.3691        | 0.2617 | 0.2705 | 0.1507  | 0.2911  |
|                             |        | 0.1644                  | <b>0.0376</b> | 0.1479 | 0.1343 | 0.4105  | 0.1061  |
|                             | TREM-2 | 0.0407                  | 0.0363        | 0.1536 | 0.0139 | 0.0191  | 0.0916  |
|                             |        | 0.8250                  | 0.8437        | 0.4013 | 0.9397 | 0.9175  | 0.6179  |
|                             | YKL-40 | 0.2837                  | 0.2991        | 0.3105 | 0.2093 | 0.1393  | 0.2449  |
|                             |        | 0.1156                  | 0.0963        | 0.0837 | 0.2503 | 0.4470  | 0.1768  |

(b)

| NIC<br>n = 45               |        | Serum biomarkers (r, p) |                   |        |         |               |               |
|-----------------------------|--------|-------------------------|-------------------|--------|---------|---------------|---------------|
|                             |        | GFAP                    | NFL               | OPN    | TIMP-1  | TREM-2        | YKL-40        |
| CSF<br>biomarkers<br>(r, p) | GFAP   | 0.4533                  | 0.1891            | 0.1205 | -0.1148 | 0.2454        | 0.2221        |
|                             |        | <b>0.0023</b>           | 0.2247            | 0.4415 | 0.4637  | 0.1127        | 0.1522        |
|                             | NFL    | -0.1323                 | <b>0.6498</b>     | 0.2884 | 0.1262  | -0.0310       | 0.0046        |
|                             |        | 0.3921                  | <b>&lt;0.0001</b> | 0.0576 | 0.4144  | 0.8416        | 0.9764        |
|                             | OPN    | 0.3290                  | -0.2163           | 0.1009 | -0.1630 | 0.1722        | 0.1801        |
|                             |        | <b>0.0273</b>           | 0.1535            | 0.5095 | 0.2848  | 0.2580        | 0.2365        |
|                             | TIMP-1 | 0.1642                  | 0.2447            | 0.2868 | 0.0972  | -0.0082       | 0.1759        |
|                             |        | 0.2812                  | 0.1053            | 0.0561 | 0.5252  | 0.9575        | 0.2478        |
|                             | TREM-2 | 0.2850                  | 0.1461            | 0.1132 | -0.0584 | 0.1772        | 0.0157        |
|                             |        | 0.0578                  | 0.3382            | 0.4592 | 0.7033  | 0.2442        | 0.9186        |
|                             | YKL-40 | 0.4896                  | 0.0072            | 0.1665 | -0.0568 | 0.3033        | 0.3545        |
|                             |        | <b>0.0006</b>           | 0.9623            | 0.2742 | 0.7110  | <b>0.0428</b> | <b>0.0169</b> |

**Table S3. Summary table of Spearman correlation between CSF vs serum neuroinflammatory biomarkers.** r-value and p-value are displayed for each correlation as r, p respectively. p-values < 0.05 and r-values  $\geq 0.50$  or  $\leq -0.50$  are given in bold-italic entries. (a) MCI cohort. (b) NIC cohort.

GFAP: Glial fibrillary acidic protein. NFL: Neurofilament light; OPN: Osteopontin; TIMP-1: Tissue inhibitor of metalloproteinase 1; sTREM-2: soluble Triggering receptor expressed on myeloid cells 2; YKL-40: Chitinase-3-like 1 (CHI3L1).

(a)

| MCI<br>n = 32               |       | Serum biomarkers (r, p) |                      |                      |        |         |                      |
|-----------------------------|-------|-------------------------|----------------------|----------------------|--------|---------|----------------------|
|                             |       | CRP                     | IL-18                | IL-6                 | IL-8   | IP-10   | MCP-1                |
| CSF<br>biomarkers<br>(r, p) | CRP   | 0.1889                  | 0.3962               | <b><i>0.5009</i></b> | 0.3452 | -0.0734 | 0.3397               |
|                             |       | 0.3088                  | <b><i>0.0273</i></b> | <b><i>0.0041</i></b> | 0.0617 | 0.6948  | 0.0616               |
|                             | IL-18 | -0.0844                 | 0.1517               | 0.2873               | 0.1262 | -0.1139 | 0.2073               |
|                             |       | 0.6462                  | 0.4073               | 0.1108               | 0.4987 | 0.5346  | 0.2549               |
|                             | IL-6  | 0.2584                  | 0.1378               | 0.3530               | 0.3028 | -0.0552 | 0.2518               |
|                             |       | 0.1533                  | 0.4519               | <b><i>0.0475</i></b> | 0.0977 | 0.7642  | 0.1644               |
|                             | IL-8  | 0.1397                  | 0.0356               | -0.0561              | 0.0331 | -0.3381 | -0.2071              |
|                             |       | 0.4458                  | 0.8468               | 0.7602               | 0.8598 | 0.0584  | 0.2554               |
|                             | IP-10 | -0.2782                 | -0.0918              | 0.1398               | 0.2194 | -0.0919 | -0.0106              |
|                             |       | 0.1231                  | 0.6172               | 0.4454               | 0.2358 | 0.6171  | 0.9540               |
|                             | MCP-1 | 0.3727                  | 0.4781               | <b><i>0.5248</i></b> | 0.1285 | 0.1987  | 0.4202               |
|                             |       | <b><i>0.0357</i></b>    | <b><i>0.0056</i></b> | <b><i>0.0020</i></b> | 0.4910 | 0.2757  | <b><i>0.0167</i></b> |

(b)

| NIC<br>n = 45               |       | Serum biomarkers (r, p) |                          |                      |                      |                      |         |
|-----------------------------|-------|-------------------------|--------------------------|----------------------|----------------------|----------------------|---------|
|                             |       | CRP                     | IL-18                    | IL-6                 | IL-8                 | IP-10                | MCP-1   |
| CSF<br>biomarkers<br>(r, p) | CRP   | 0.3990                  | 0.0848                   | 0.3481               | 0.4084               | 0.1329               | -0.0042 |
|                             |       | <b><i>0.0098</i></b>    | 0.5887                   | <b><i>0.0222</i></b> | <b><i>0.0065</i></b> | 0.3956               | 0.9785  |
|                             | IL-18 | -0.1515                 | <b><i>0.6151</i></b>     | 0.0498               | 0.1765               | 0.0922               | 0.1457  |
|                             |       | 0.3323                  | <b><i>&lt;0.0001</i></b> | 0.7453               | 0.2462               | 0.5471               | 0.3395  |
|                             | IL-6  | 0.1630                  | -0.0052                  | 0.1936               | 0.3506               | 0.2905               | 0.2833  |
|                             |       | 0.2962                  | 0.9731                   | 0.2025               | <b><i>0.0182</i></b> | 0.0529               | 0.0593  |
|                             | IL-8  | -0.1349                 | 0.0020                   | -0.0559              | 0.1851               | 0.3193               | -0.0266 |
|                             |       | 0.3883                  | 0.9894                   | 0.7152               | 0.2236               | <b><i>0.0325</i></b> | 0.8622  |
|                             | IP-10 | 0.1135                  | 0.1185                   | 0.1948               | 0.3255               | 0.3278               | 0.1262  |
|                             |       | 0.4687                  | 0.4380                   | 0.1997               | <b><i>0.0291</i></b> | <b><i>0.0280</i></b> | 0.4087  |
|                             | MCP-1 | 0.1876                  | 0.0061                   | 0.1601               | 0.3827               | 0.1591               | 0.2178  |
|                             |       | 0.2284                  | 0.9681                   | 0.2935               | <b><i>0.0095</i></b> | 0.2965               | 0.1507  |

**Table S4. Summary table of Spearman correlation between CSF vs serum inflammatory biomarkers.** r-value and p-value are displayed for each correlation as r, p respectively. p-values < 0.05 and r-values ≥ 0.50 or ≤ -0.50 are given in bold-italic entries. (a) MCI cohort. (b) NIC cohort.

CRP: C-reactive protein; IL: Interleukin; IP-10: Interferon gamma-induced protein 10; MCP-1: Monocyte chemoattractant protein 1; TNFα: Tumor necrosis factor α.

(a)

| MCI<br>n = 32               |       | Serum biomarkers (r, p) |        |
|-----------------------------|-------|-------------------------|--------|
|                             |       | ASC                     | IL-18  |
| CSF<br>biomarkers<br>(r, p) | ASC   | 0.1685                  | 0.1327 |
|                             |       | 0.3566                  | 0.4689 |
|                             | IL-18 | 0.0322                  | 0.1517 |
|                             |       | 0.8611                  | 0.4073 |

(b)

| NIC<br>n = 45               |       | Serum biomarkers (r, p) |                   |
|-----------------------------|-------|-------------------------|-------------------|
|                             |       | ASC                     | IL-18             |
| CSF<br>biomarkers<br>(r, p) | ASC   | 0.3820                  | 0.1269            |
|                             |       | <b>0.0096</b>           | 0.4062            |
|                             | IL-18 | 0.1333                  | <b>0.5747</b>     |
|                             |       | 0.3828                  | <b>&lt;0.0001</b> |

**Table S5. Summary tables of Spearman correlation between CSF vs serum inflammasome biomarkers.** r-value and p-value are displayed for each correlation as r, p respectively. p-values < 0.05 and r-values  $\geq 0.50$  or  $\leq -0.50$  are given in bold-italic entries. (a) MCI cohort. (b) NIC cohort. ASC: (apoptosis-associated speck-like protein containing a CARD).

(a)

| MCI<br>n = 32                 |              | Serum Biomarkers (r, p)            |                                    |                                    |                                    |                                    |                                    |                                |              |
|-------------------------------|--------------|------------------------------------|------------------------------------|------------------------------------|------------------------------------|------------------------------------|------------------------------------|--------------------------------|--------------|
|                               |              | ASC                                | Caspase-1                          | IL-1 $\beta$                       | IL-1Ra                             | IL-18                              | IL-6                               | CRP                            | TNF $\alpha$ |
| Serum<br>biomarkers<br>(r, p) | ASC          | 1.0000                             |                                    |                                    |                                    |                                    |                                    |                                |              |
|                               |              | -                                  |                                    |                                    |                                    |                                    |                                    |                                |              |
|                               | Caspase-1    | <b>0.9663</b><br><b>&lt;0.0001</b> | 1.0000<br>-                        |                                    |                                    |                                    |                                    |                                |              |
|                               | IL-1 $\beta$ | <b>0.8079</b><br><b>&lt;0.0001</b> | <b>0.7819</b><br><b>&lt;0.0001</b> | 1.0000<br>-                        |                                    |                                    |                                    |                                |              |
|                               | IL-1Ra       | <b>0.7735</b><br><b>&lt;0.0001</b> | <b>0.7023</b><br><b>&lt;0.0001</b> | <b>0.6246</b><br><b>&lt;0.0001</b> | 1.0000<br>-                        |                                    |                                    |                                |              |
|                               | IL-18        | 0.4898<br><b>0.0044</b>            | 0.4223<br><b>0.0160</b>            | 0.4368<br><b>0.0124</b>            | <b>0.6936</b><br><b>&lt;0.0001</b> | 1.0000<br>-                        |                                    |                                |              |
|                               | IL-6         | <b>0.6605</b><br><b>&lt;0.0001</b> | <b>0.5598</b><br><b>0.0009</b>     | <b>0.5111</b><br><b>0.0028</b>     | <b>0.7792</b><br><b>&lt;0.0001</b> | <b>0.5485</b><br><b>0.0012</b>     | 1.0000<br>-                        |                                |              |
|                               | CRP          | 0.4732<br><b>0.0062</b>            | 0.4172<br><b>0.0175</b>            | 0.4842<br><b>0.0050</b>            | 0.4505<br><b>0.0097</b>            | <b>0.5074</b><br><b>0.0030</b>     | <b>0.6427</b><br><b>&lt;0.0001</b> | 1.0000<br>-                    |              |
|                               | TNF $\alpha$ | 0.4744<br><b>0.0093</b>            | 0.3399<br>0.0712                   | 0.4517<br><b>0.0139</b>            | <b>0.5562</b><br><b>0.0017</b>     | <b>0.7395</b><br><b>&lt;0.0001</b> | <b>0.6807</b><br><b>&lt;0.0001</b> | <b>0.6197</b><br><b>0.0003</b> | 1.0000<br>-  |

(b)

| NIC<br>n = 45                 |              | Serum Biomarkers (r, p)            |                         |                                    |                         |                   |                                    |                  |              |
|-------------------------------|--------------|------------------------------------|-------------------------|------------------------------------|-------------------------|-------------------|------------------------------------|------------------|--------------|
|                               |              | ASC                                | Caspase-1               | IL-1 $\beta$                       | IL-1Ra                  | IL-18             | IL-6                               | CRP              | TNF $\alpha$ |
| Serum<br>biomarkers<br>(r, p) | ASC          | 1.0000                             |                         |                                    |                         |                   |                                    |                  |              |
|                               |              | -                                  |                         |                                    |                         |                   |                                    |                  |              |
|                               | Caspase-1    | <b>0.7754</b><br><b>&lt;0.0001</b> | 1.0000<br>-             |                                    |                         |                   |                                    |                  |              |
|                               | IL-1 $\beta$ | 0.4325<br><b>0.0042</b>            | 0.3501<br><b>0.0230</b> | 1.0000<br>-                        |                         |                   |                                    |                  |              |
|                               | IL-1Ra       | 0.2048<br>0.1773                   | 0.2992<br><b>0.0459</b> | 0.4221<br><b>0.0054</b>            | 1.0000<br>-             |                   |                                    |                  |              |
|                               | IL-18        | 0.0657<br>0.6681                   | 0.0561<br>0.7145        | 0.1968<br>0.2117                   | 0.2079<br>0.1706        | 1.0000<br>-       |                                    |                  |              |
|                               | IL-6         | 0.2372<br>0.1167                   | 0.0916<br>0.5494        | <b>0.6096</b><br><b>&lt;0.0001</b> | 0.3963<br><b>0.0070</b> | 0.0697<br>0.6491  | 1.0000<br>-                        |                  |              |
|                               | CRP          | 0.0671<br>0.6692                   | -0.1440<br>0.3569       | 0.4625<br><b>0.0027</b>            | 0.2510<br>0.1045        | -0.1313<br>0.4013 | <b>0.8072</b><br><b>&lt;0.0001</b> | 1.0000<br>-      |              |
|                               | TNF $\alpha$ | 0.0435<br>0.8260                   | 0.0104<br>0.9581        | 0.0169<br>0.9360                   | 0.1095<br>0.5792        | 0.1196<br>0.5443  | 0.4001<br><b>0.0349</b>            | 0.1673<br>0.4043 | 1.0000<br>-  |

(c)

| HC<br>n = 30                  |              | Serum Biomarkers (r, p) |                          |                         |                         |                  |                         |                  |             |
|-------------------------------|--------------|-------------------------|--------------------------|-------------------------|-------------------------|------------------|-------------------------|------------------|-------------|
| Serum<br>biomarkers<br>(r, p) | ASC          | 1.0000                  |                          |                         |                         |                  |                         |                  |             |
|                               |              | -                       |                          |                         |                         |                  |                         |                  |             |
|                               | Caspase-1    | 0.4965<br><b>0.0053</b> | 1.0000<br>-              |                         |                         |                  |                         |                  |             |
|                               | IL-1 $\beta$ | 0.2582<br>0.2126        | 0.3733<br>0.0661         | 1.0000<br>-             |                         |                  |                         |                  |             |
|                               | IL-1Ra       | 0.2770<br>0.1384        | 0.2629<br>0.1604         | 0.2135<br>0.3055        | 1.0000<br>-             |                  |                         |                  |             |
|                               | IL-18        | 0.2148<br>0.2544        | 0.1818<br>0.3363         | 0.0961<br>0.6478        | 0.1237<br>0.5147        | 1.0000<br>-      |                         |                  |             |
|                               | IL-6         | -0.2152<br>0.2535       | -0.1715<br>0.3647        | 0.4510<br><b>0.0236</b> | 0.4045<br><b>0.0266</b> | 0.0336<br>0.8601 | 1.0000<br>-             |                  |             |
|                               | CRP          | 0.0857<br>0.6526        | -0.3633<br><b>0.0484</b> | 0.0039<br>0.9853        | 0.1916<br>0.3105        | 0.2294<br>0.2226 | 0.3900<br><b>0.0331</b> | 1.0000<br>-      |             |
|                               | TNF $\alpha$ | 0.3944<br><b>0.0342</b> | 0.4382<br><b>0.0174</b>  | 0.4160<br><b>0.0386</b> | 0.4398<br><b>0.0170</b> | 0.1996<br>0.2993 | 0.3034<br>0.1095        | 0.1665<br>0.3880 | 1.0000<br>- |

**Table S6. Summary tables of Spearman correlation between serum inflammasome and inflammatory biomarkers.** r-value and p-value are displayed for each correlation as r, p respectively. p-values < 0.05 and r-values  $\geq 0.50$  or  $\leq -0.50$  are given in bold-italic entries. (a) MCI cohort. (b) NIC cohort. (c) Healthy Control (HC) cohort. IL-1Ra: Interleukin-1 receptor antagonist.
